# Supplementary material
Source: Springer Nature journal article supplement (https://www.springermedizin.de/resource/supplementary/13685_2014_31_MOESM18_ESM.pdf/9681246)
Supplement: MOESM18 [file 9681246]

**Grx1 mRNA**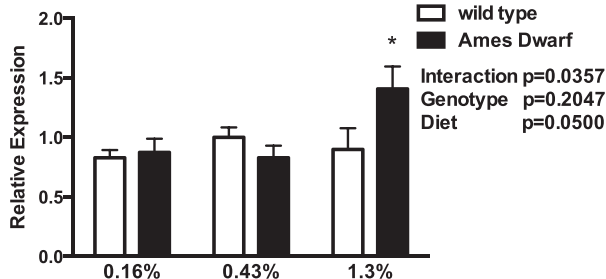**Grx2 mRNA**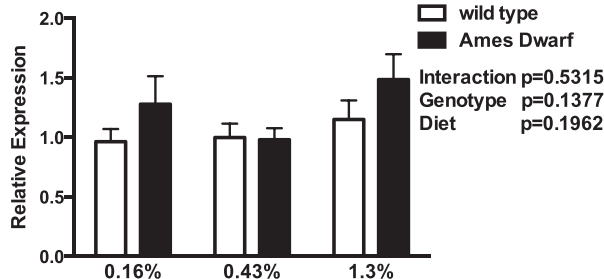**Trx1 mRNA**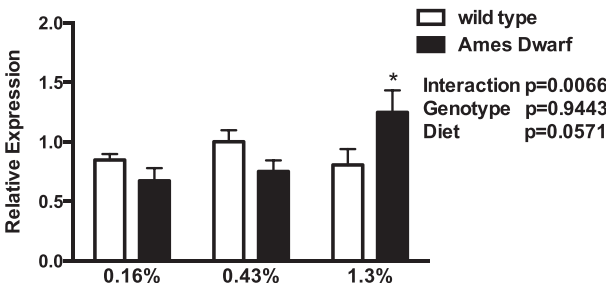**Trx2 mRNA**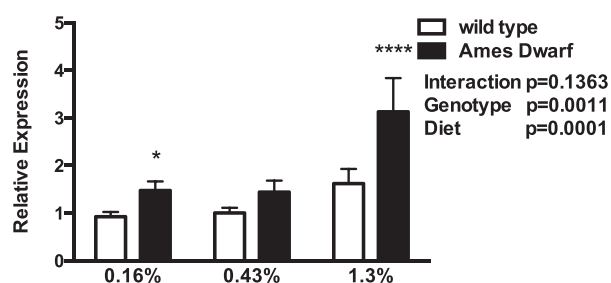**Trx R1 mRNA**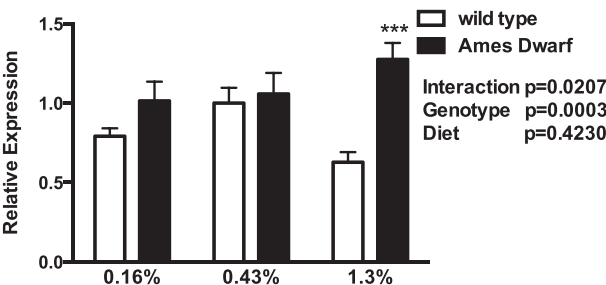**Trx R2 mRNA**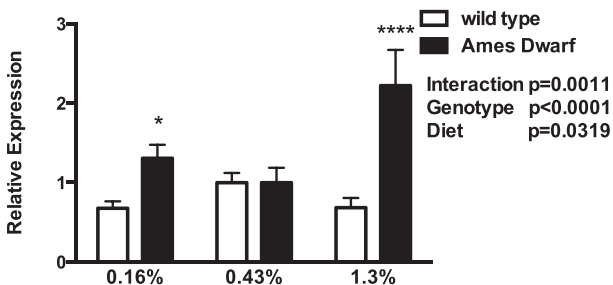**Trx Activity**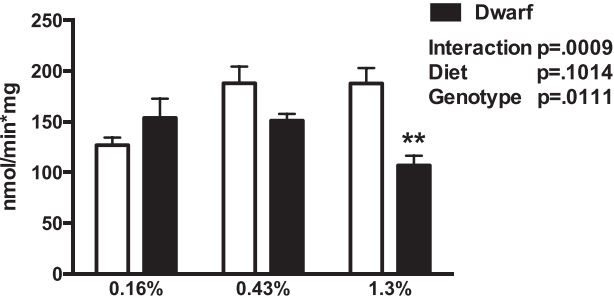**% methionine****Grx Activity**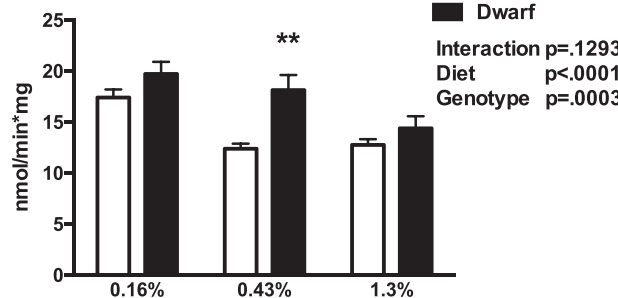**% methionine**
